# Supplementary material for: Circulation of Baffin Bay and Hudson Bay waters on the Labrador shelf and into the subpolar North Atlantic
Source: Copernicus journal article supplement (doi:10.5194/os-21-241-2025), 2025-01-28
Supplement: Supplementary file 1 [file os-21-241-2025-supplement.pdf]

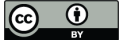

*Supplement of*

## **Circulation of Baffin Bay and Hudson Bay waters on the Labrador shelf and into the subpolar North Atlantic**

**Elodie Duyck et al.**

*Correspondence to:* Elodie Duyck (elodie.duyck@uni-hamburg.de)

The copyright of individual parts of the supplement might differ from the article licence.

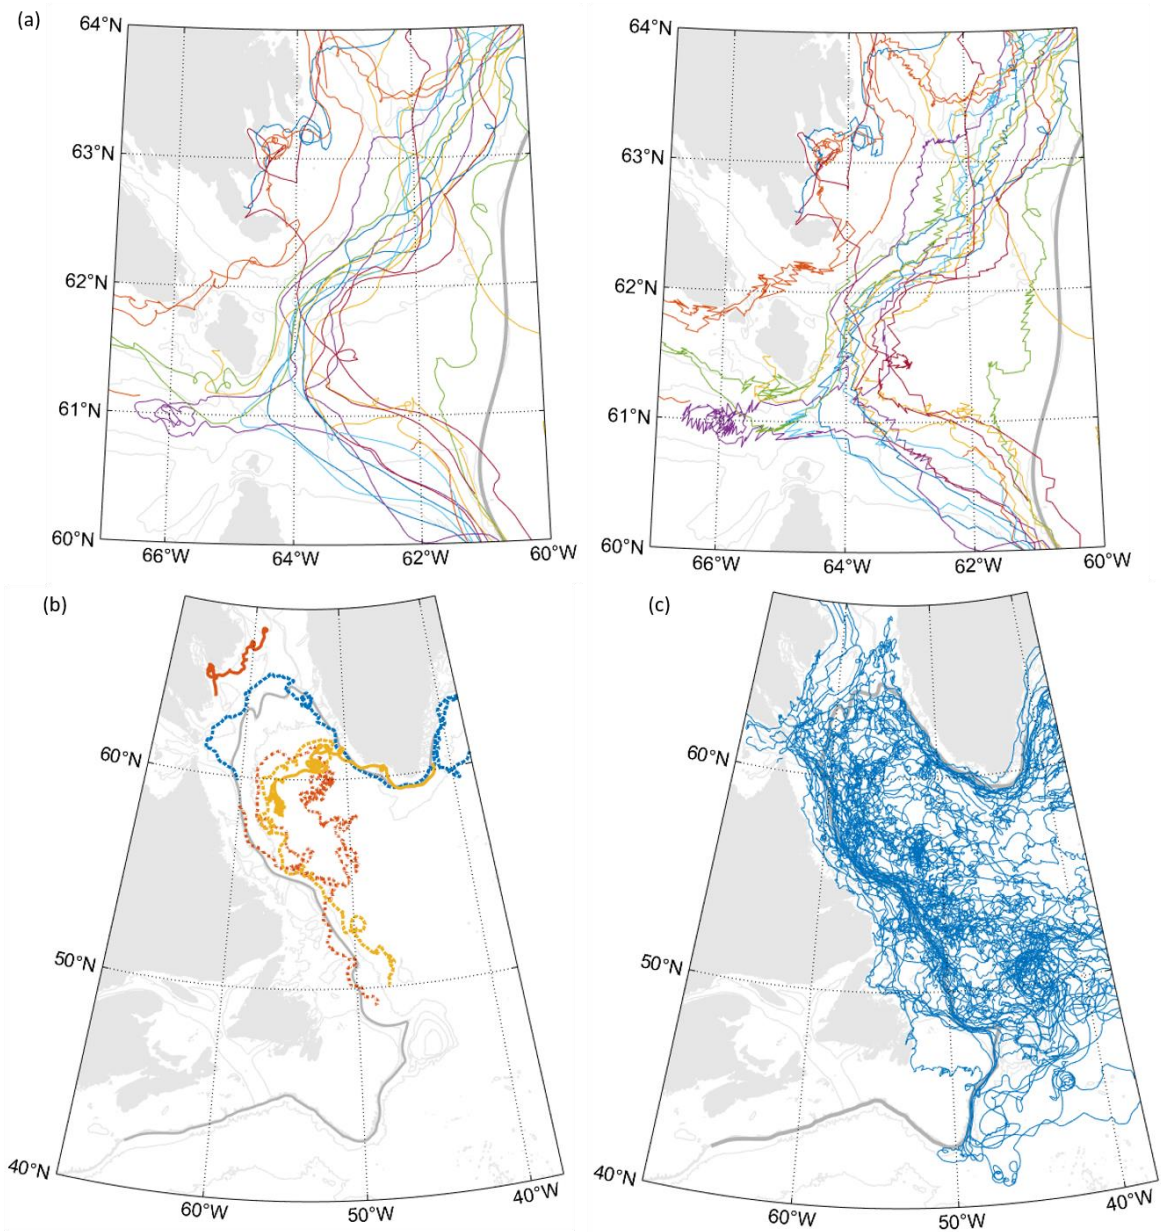

Figure S1: (a) Drifters from the TERIFIC Davis Strait deployment before (left) and after (right) applying the 25h Butterworth filter. (b) Trajectories of drifters that are cut after not transmitting for more than 30 days, and which part of the cut trajectory is over the Labrador Shelf. The trajectories are shown with solid lines before the data gap and with dotted lines after the gap. The drifter shown

in blue had a data gap before entering the region, therefore only the trajectory after that gap is shown. We treat trajectories after data gaps greater than 30 days in the same way as we treat data from drifters that lost their drogues. (c) Undrogued drifters over the Labrador Shelf. The figure shows all drifters that flowed over the Labrador Shelf (partly) while undrogued. These parts of the drifter trajectories are not used in the study because they cannot be trusted to properly represent the circulation as they are more directly influenced by winds and waves.

10

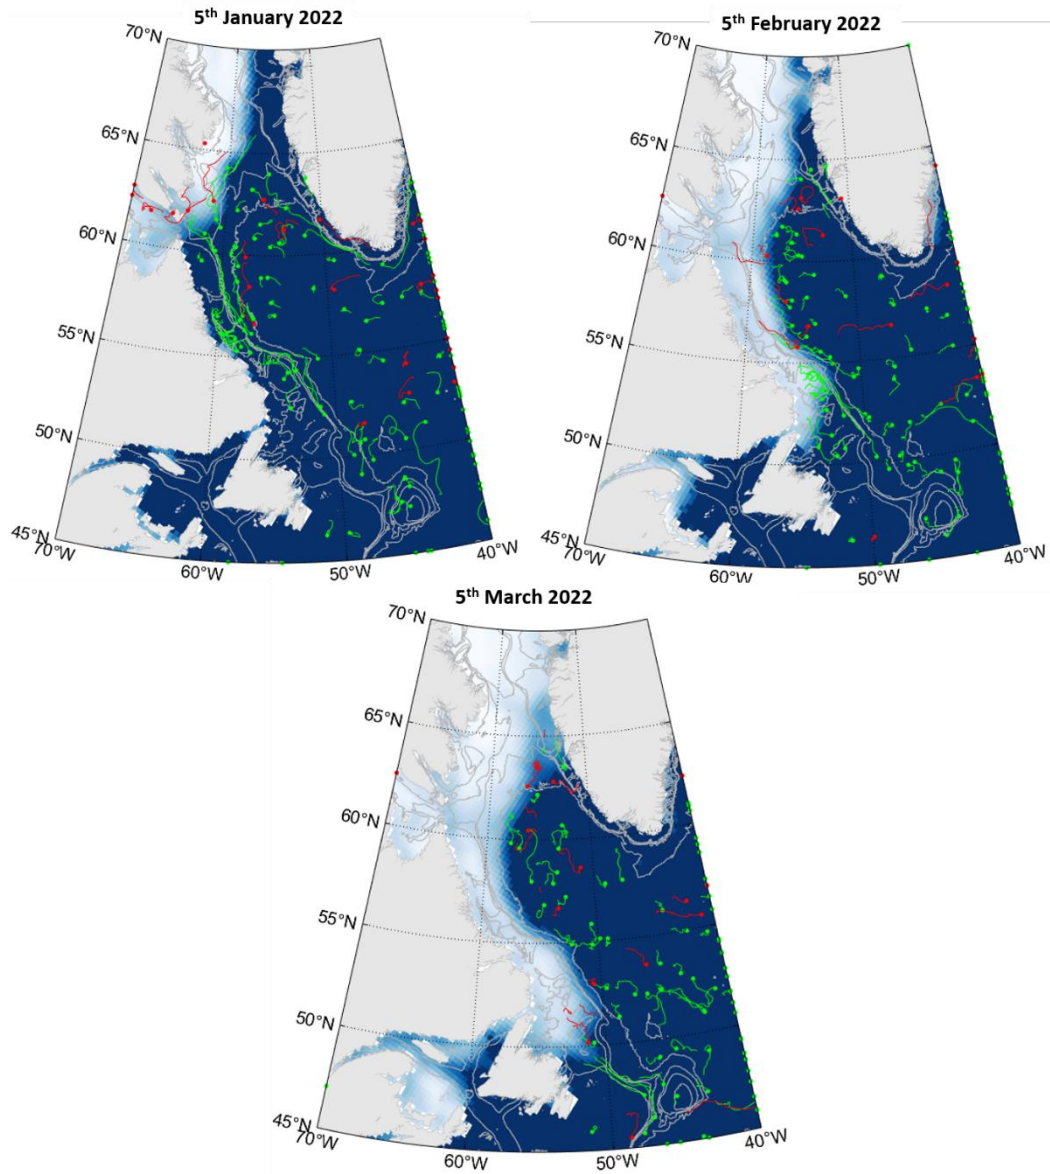

Figure S2: Snapshots of sea ice concentration from OSISAF and of drifter trajectories. The position of drifters at a given time is shown with a circle. The trajectory for the last month is shown. Drogued drifters are colored greens, and become red once they lose their drogue. While the Labrador Shelf was largely ice free in January, sea ice rapidly extended down the shelf in February and March, leading to most of the drifters over the shelf coming in contact with sea ice, which led to them stopping transmission or losing their drogue.

15

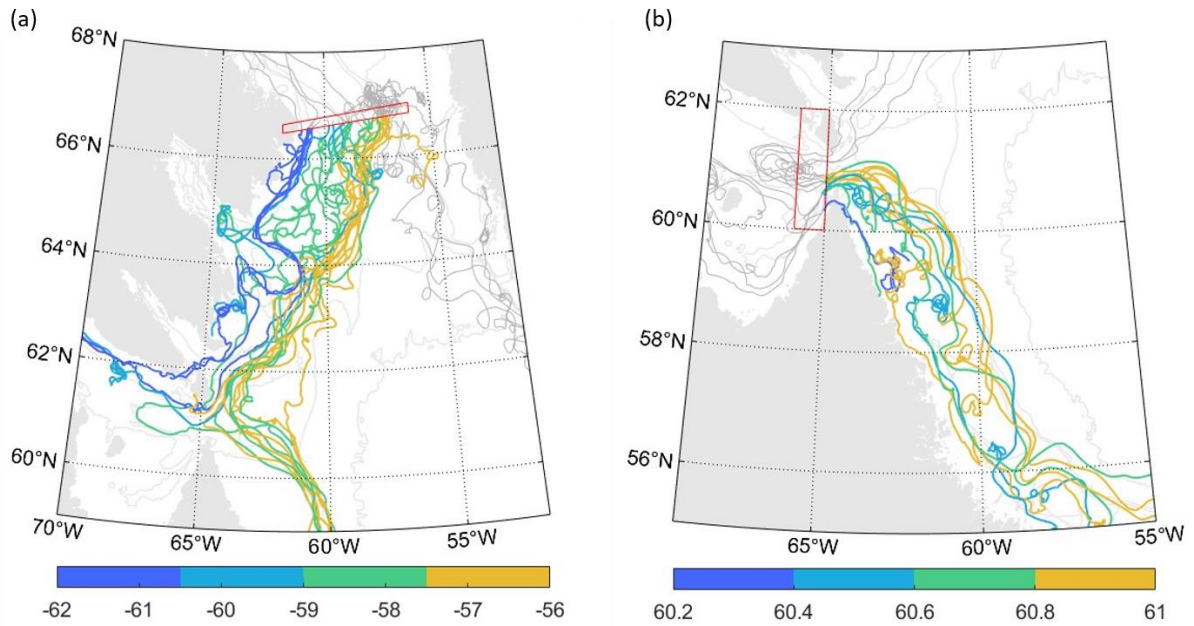

20 **Figure S3: (a) Drifters heading southwards from Davis Strait, coloured by longitude when exiting the strait. The most onshore drifters at Davis Strait remain close to the coast as they flow downstream and make up the majority of drifters entering Hudson Strait. The most offshore drifters are recirculating from the West Greenland Current and part of them are found in the offshore current near Hudson Strait. (b) Drifters heading eastwards from Hudson Strait, coloured by latitude when leaving the strait. Only two of the drifters closely follow the coast past the strait. They both stop transmitting shortly after. The other drifters, even if close to the shelf when exiting the strait, are directed towards the shelfbreak over the Labrador Shelf, and only recirculate over the inner shelf south of 60°N.**

25

30

35

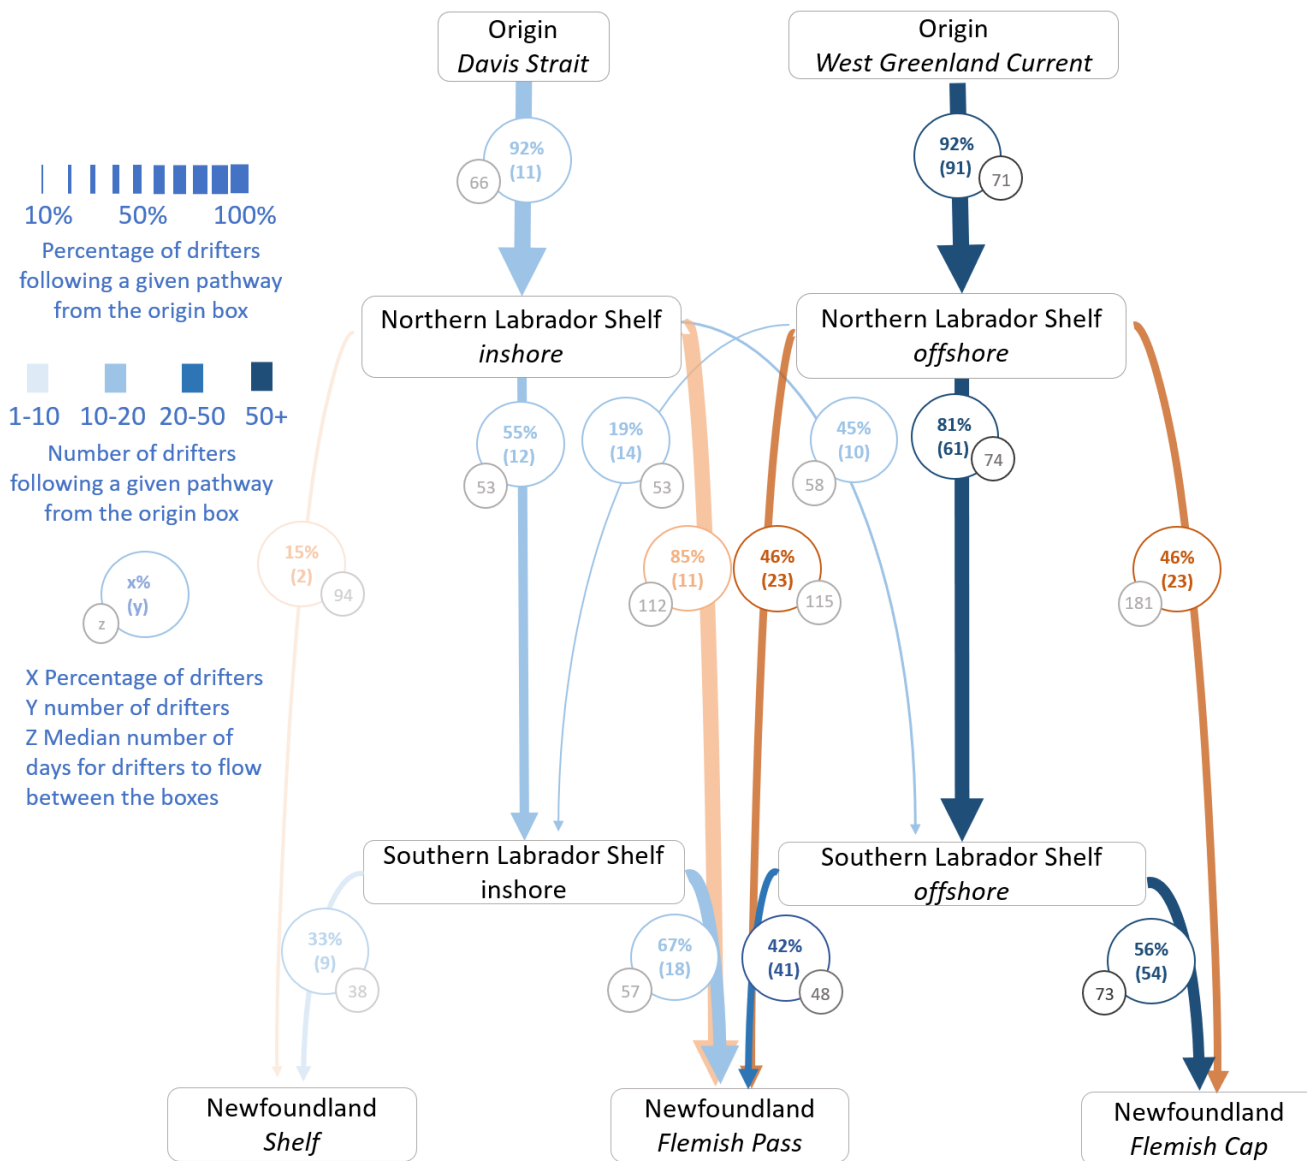

**Figure S4:** Same as Fig. 7, with direct connections between the Hudson Strait Mouth and Hamilton Bank (in blue), and between the Hudson Strait mouth to Newfoundland sections (in orange).

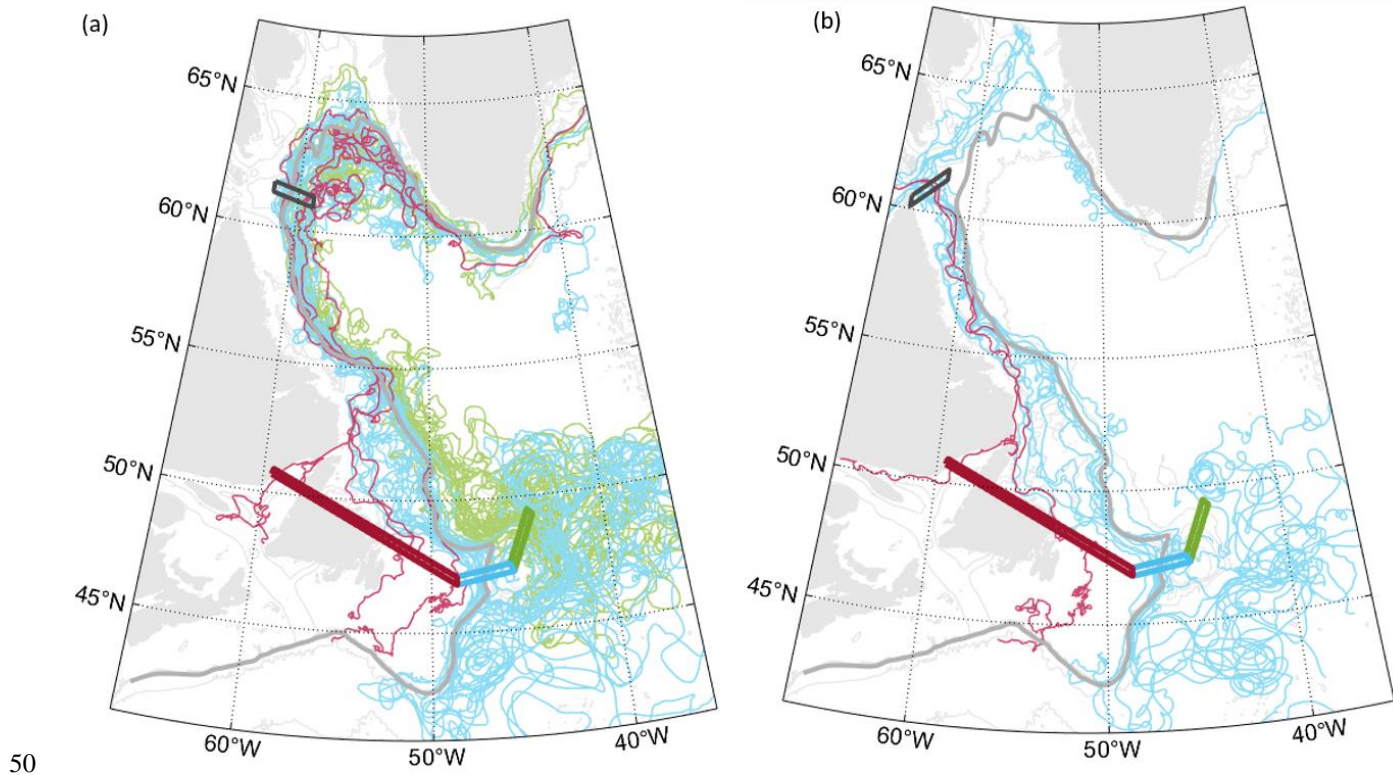

**Figure S5: Same as Fig. 8, for drifters flowing between the northern Labrador Shelf and Newfoundland section. The colour of the trajectories corresponds to the box they cross at the Newfoundland section: Newfoundland Shelf (green), Flemish Pass (Blue), Flemish Cap (Red)**

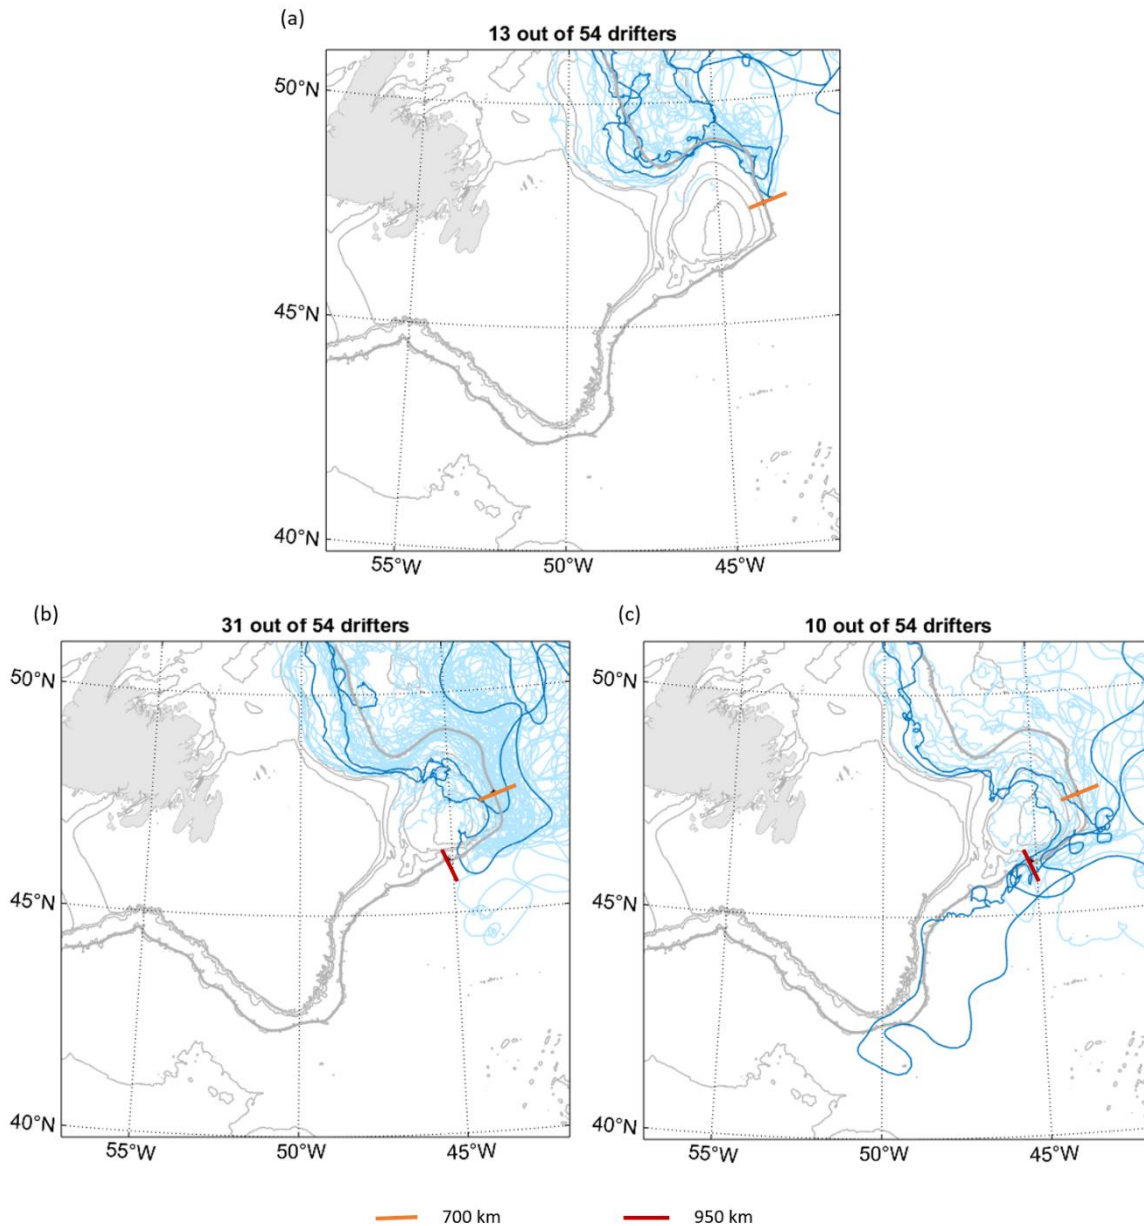

55 Figure S6: Same as Fig. 9, for drifters that crossed the Newfoundland section at the Flemish Cap segment. We use the 2500m isobath  
as shelf boundary (shown in bold grey), that we define in a similar manner as for the 1000m isobath as described in Sect. 2.2, but  
only in the Newfoundland region. As in Fig. 9, we separate different behaviours of drifters that flowed through Flemish Cap by  
computing where they left the shelf boundary. The three panels show drifters that left the Flemish Cap area: (a) In the northern  
part of Flemish Cap (before 700km along the shelf, orange section), (b) In the south-eastern part of Flemish Cap (700-950km, orange  
60 to red sections), (c) At the southwestern end of Flemish Cap and beyond (past 950km, red section). In all cases, the darker blue  
trajectories represent examples of trajectories for the group of drifters. Bathymetry in light grey, 5000, 2500, 1000, 500, 250m  
isobaths.
